# Supplementary material for: Nano-assemblies of phosphonium-functionalized diblock copolymers with fabulous antibacterial properties and relationships of structure-activity
Source: Royal Society of Chemistry journal article supplement (doi:10.1039/d2tb01778d), 2022-01-01
Supplement: d2tb01778d1.pdf [file d2tb01778d1.pdf]

## Supplementary Materials

### Nano-assemblies of Phosphonium-functionalized Diblock Copolymers with Fabulous Antibacterial and Relationships of Structure-Activity

Peng Cao<sup>a</sup>, Xue Bai<sup>a</sup>, Yufeng He<sup>a</sup>, Pengfei Song<sup>a</sup>, Rongmin Wang<sup>a\*</sup>, Junchao Huang<sup>b\*</sup>

<sup>a</sup> Key Lab. Eco-functional Polymer Materials of MOE, Institute of Polymers, College of Chemistry & Chemical Engineering, Northwest Normal University, Lanzhou 730070, China.

<sup>b</sup> School of Engineering, Westlake University, Hangzhou 310030, China.

E-mail address: [wangrm@nwnu.edu.cn](mailto:wangrm@nwnu.edu.cn); [huangjunchao@westlake.edu.cn](mailto:huangjunchao@westlake.edu.cn)

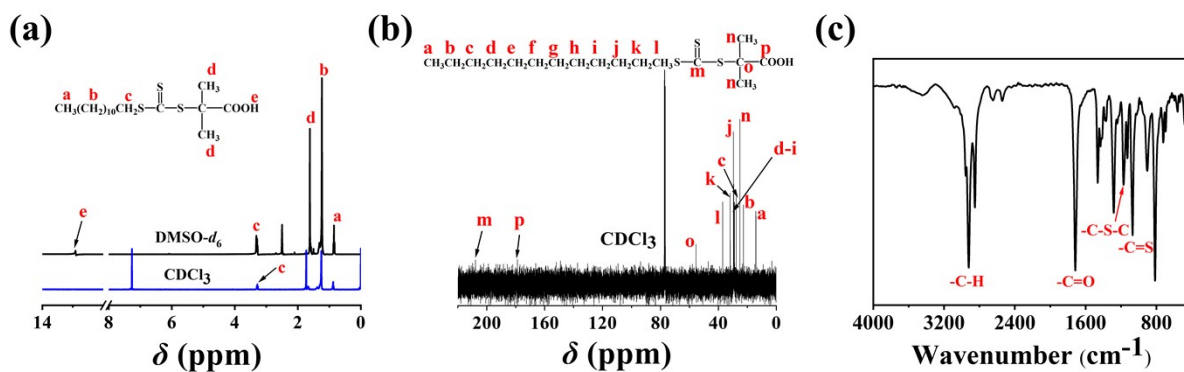

Figure S1. <sup>1</sup>H (a) and <sup>13</sup>C (b) NMR and FTIR (c) spectra of DCMAT.

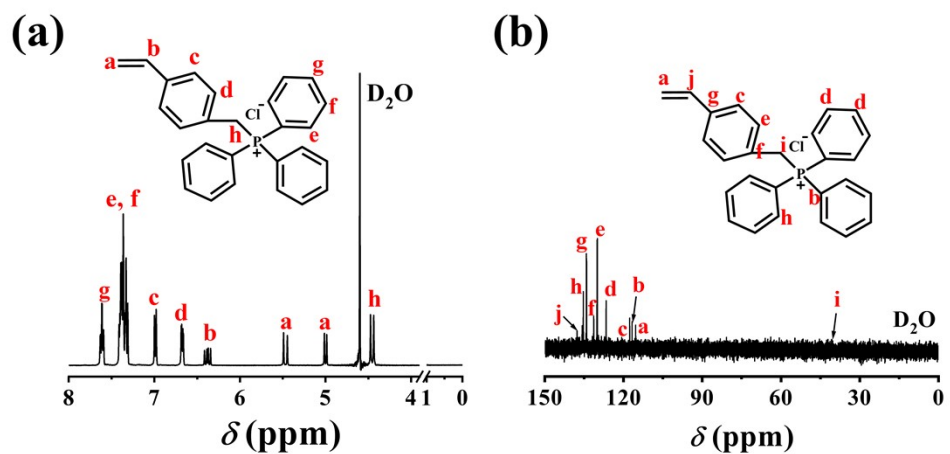

Figure S2.  $^1\text{H}$  (a) and  $^{13}\text{C}$  (b) NMR spectrum of QPSPH<sub>3</sub>IL.

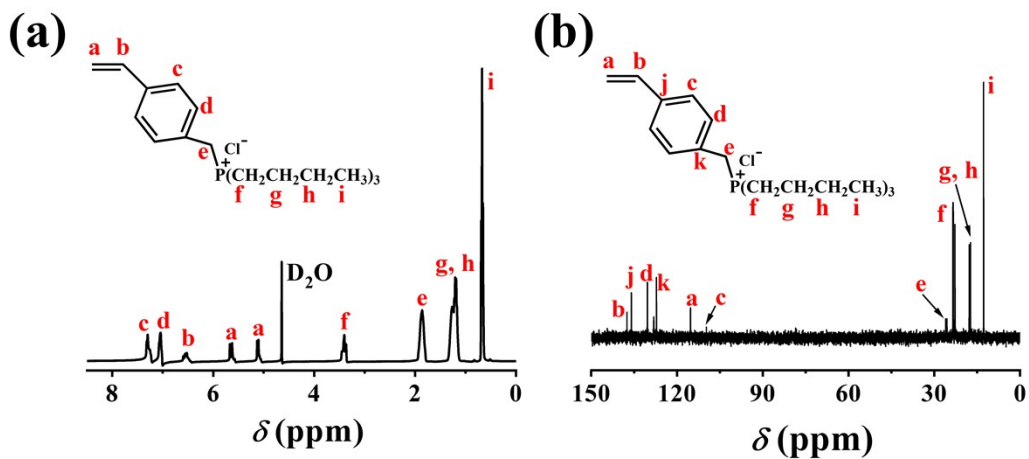

Figure S3.  $^1\text{H}$  (a) and  $^{13}\text{C}$  (b) NMR spectrum of QPSBu<sub>3</sub>IL.

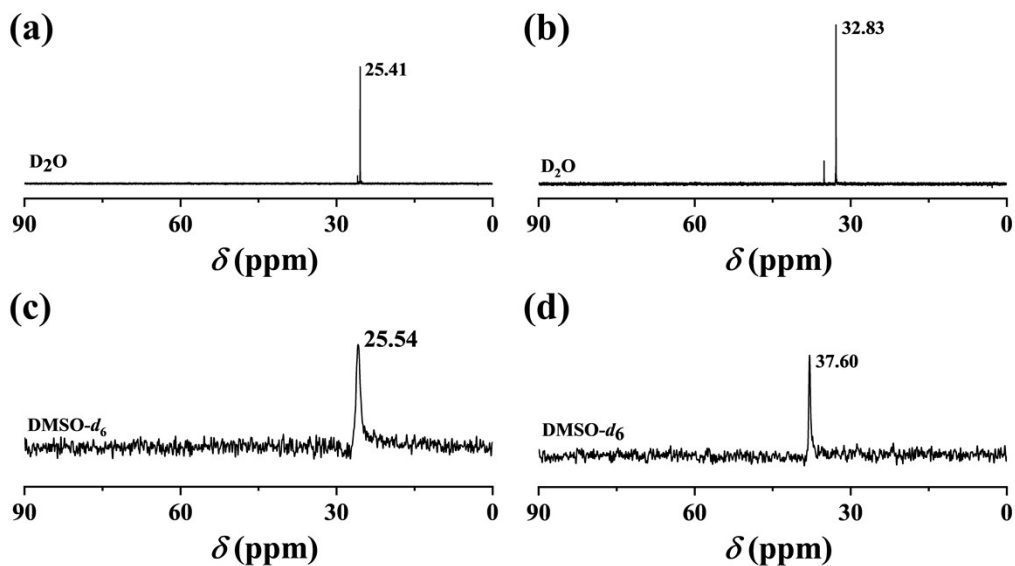

**Figure S4.**  $^{31}\text{P}$  NMR spectra of  $\text{Bu}_{60}$  (a),  $\text{Ph}_{60}$  (b),  $\text{Bu}_{60}\text{St}_{120}\text{-M}$  (c) and  $\text{Ph}_{60}\text{St}_{120}\text{-M}$  (d).

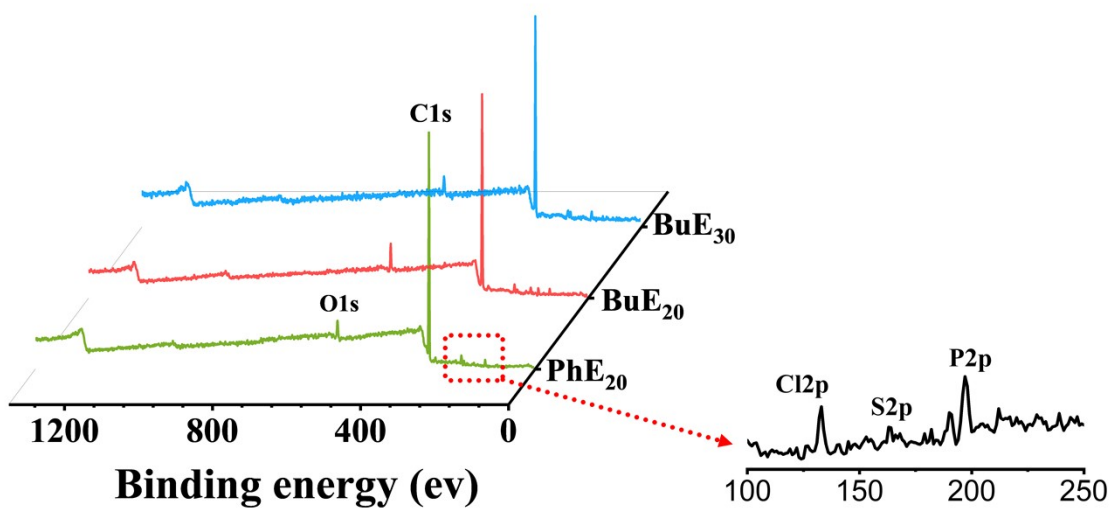

**Figure S5.** XPS analysis for  $\text{PhE}_{20}$ ,  $\text{BuE}_{20}$ , and  $\text{BuE}_{30}$  samples to identify the existence of carbon, oxygen, phosphorus, chlorine, and sulfur element.

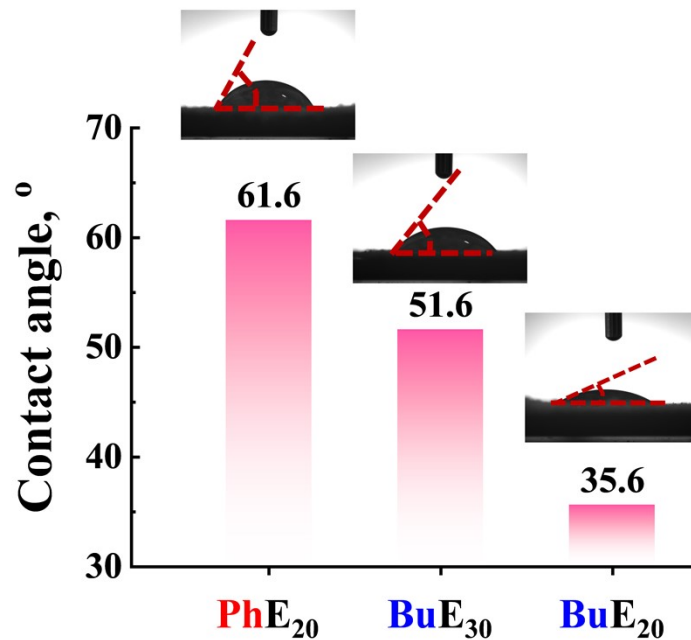

Figure S6. The contact angle of several PEGDMA crosslinked PFDCs.

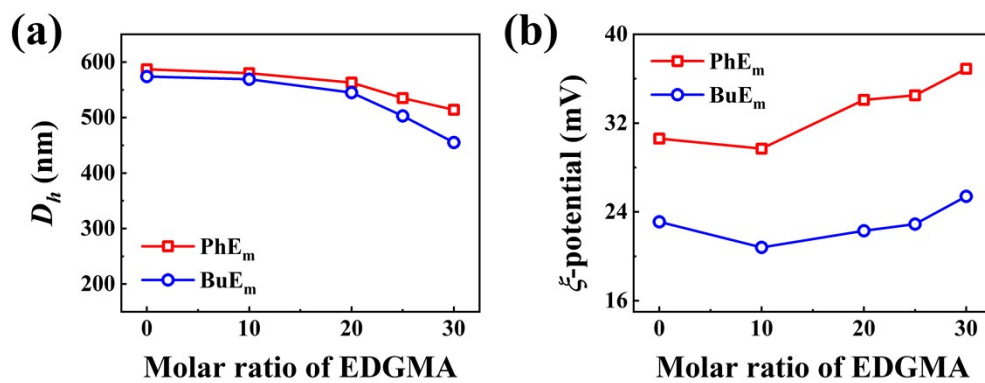

Figure S7. The molar ratio of EDGMA dependence of particle size ( $D_h$ , nm) (a) and  $\zeta$ -potential (mV) (b).

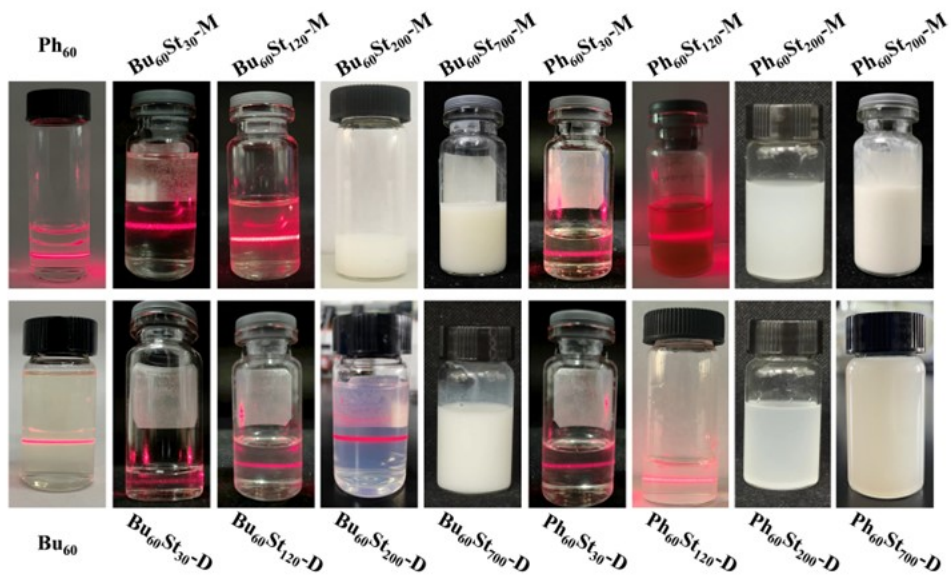

Figure S8. Tyndall effect of  $Bu_{60}St_y$  and  $Ph_{60}St_y$  PFDCs in either methanol or 1,4-dioxane solvent.

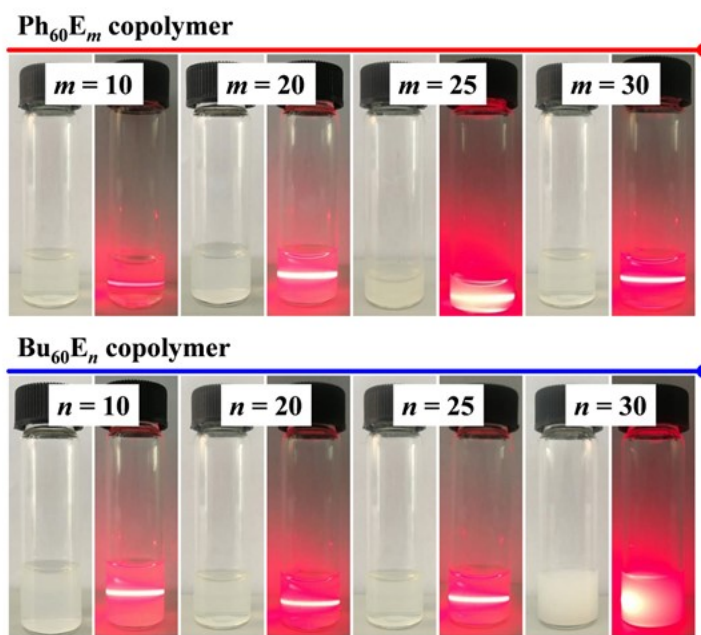

Figure S9. Tyndall effect of PEGDMA crosslinked PFDCs in methanol solution.

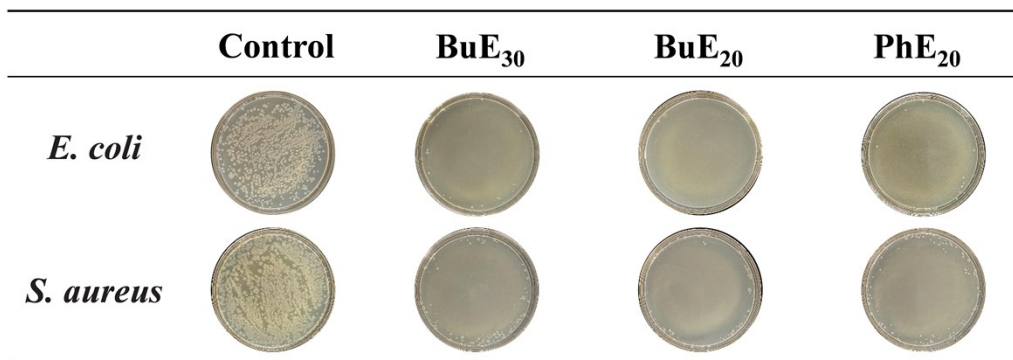

**Figure S10.** Photographs of the culture plates for *E. coli* and *S. aureus* after exposure to PhE<sub>20</sub>, BuE<sub>20</sub>, and BuE<sub>30</sub>.

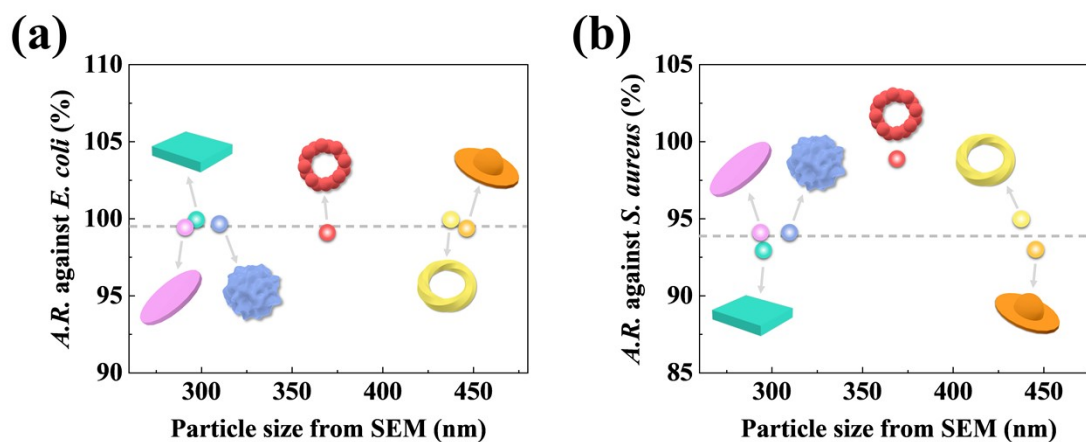

**Figure S11.** Antibacterial activity against *E. coli* (a) and *S. aureus* (b) of the PFDCs with special morphology. The diameter was obtained from the SEM result.

**Table S1.** Summary of molecular weight and conversion rate for all non-crosslinked PFDC diblock copolymers.

| Synthesis Media | Block Copolymer <sup>a</sup>          | Targeted DP for St | Time (h) | Conv. (%) <sup>b</sup> | $M_{n,th}$ (g·mol <sup>-1</sup> ) <sup>c</sup> | $M_{n,APC}$ (g·mol <sup>-1</sup> ) | $\bar{D}$ |
|-----------------|---------------------------------------|--------------------|----------|------------------------|------------------------------------------------|------------------------------------|-----------|
| Methanol        | Bu <sub>60</sub> St <sub>700</sub> -M | 700                | 16       | 97.6%                  | 94567                                          | 85644                              | 1.25      |
|                 | Bu <sub>60</sub> St <sub>200</sub> -M | 200                | 16       | 97.5%                  | 42492                                          | 40818                              | 1.17      |
|                 | Bu <sub>60</sub> St <sub>120</sub> -M | 120                | 16       | 97.8%                  | 34160                                          | 36452                              | 1.16      |
|                 | Bu <sub>60</sub> St <sub>30</sub> -M  | 30                 | 16       | 96.9%                  | 24786                                          | 24223                              | 1.12      |
|                 | Ph <sub>60</sub> St <sub>700</sub> -M | 700                | 18       | 98.6%                  | 98163                                          | 84184                              | 1.25      |
|                 | Ph <sub>60</sub> St <sub>200</sub> -M | 200                | 18       | 98.5%                  | 46089                                          | 45574                              | 1.10      |
|                 | Ph <sub>60</sub> St <sub>120</sub> -M | 120                | 17       | 96.8%                  | 37757                                          | 35274                              | 1.13      |
|                 | Ph <sub>60</sub> St <sub>30</sub> -M  | 30                 | 16       | 95.1%                  | 28384                                          | 27666                              | 1.12      |
| 1,4-Dioxane     | Bu <sub>60</sub> St <sub>700</sub> -D | 700                | 18       | 98.8%                  | 94567                                          | 92742                              | 1.21      |
|                 | Bu <sub>60</sub> St <sub>200</sub> -D | 200                | 15       | 97.0%                  | 42492                                          | 41453                              | 1.14      |
|                 | Bu <sub>60</sub> St <sub>120</sub> -D | 120                | 16       | 97.2%                  | 34160                                          | 39280                              | 1.13      |
|                 | Bu <sub>60</sub> St <sub>30</sub> -D  | 30                 | 17       | 96.7%                  | 24786                                          | 23217                              | 1.12      |
|                 | Ph <sub>60</sub> St <sub>700</sub> -D | 700                | 17       | 98.0%                  | 98163                                          | 43580                              | 1.24      |
|                 | Ph <sub>60</sub> St <sub>200</sub> -D | 200                | 18       | 98.0%                  | 46089                                          | 43070                              | 1.24      |
|                 | Ph <sub>60</sub> St <sub>120</sub> -D | 120                | 17       | 97.2%                  | 37757                                          | 35685                              | 1.16      |
|                 | Ph <sub>60</sub> St <sub>30</sub> -D  | 30                 | 18       | 98.8%                  | 28384                                          | 26090                              | 1.15      |

<sup>a</sup> D: 1,4-dioxane; M: methanol.

<sup>b</sup> Determined by <sup>1</sup>H NMR analysis.

<sup>c</sup> Theoretical number-average molecular weight was calculated by:  $M_{n,th} = Conv. \times ([N_{monomer}/N_{CTA}]) \times M_{monomer} + M_{n,macro-CTA}$ .

<sup>d</sup>  $\bar{D}$  value was calculated by:  $\bar{D} = M_w/M_{n,APC}$ .

**Table S2.** Particle properties of PEGDMA crosslinked PFDCs with different substrate ratios measured by DLS.

| Sample <sup>a</sup> | <i>n</i> (Bu <sub>60</sub> /Ph <sub>60</sub> ): <i>n</i> (EGDMA) | <i>D<sub>h</sub></i> (nm) <sup>b</sup> | PDI <sup>c</sup> | ξ-potential (mV) |
|---------------------|------------------------------------------------------------------|----------------------------------------|------------------|------------------|
| Bu <sub>60</sub>    | 1 : 0                                                            | 574                                    | 0.108            | 23.1             |
| Ph <sub>60</sub>    | 1 : 0                                                            | 587                                    | 0.262            | 30.6             |
| BuE <sub>10</sub>   | 1 : 10                                                           | 569                                    | 0.124            | 20.8             |
| BuE <sub>20</sub>   | 1 : 20                                                           | 545                                    | 0.136            | 22.3             |
| BuE <sub>25</sub>   | 1 : 25                                                           | 503                                    | 0.202            | 22.9             |
| BuE <sub>30</sub>   | 1 : 30                                                           | 455                                    | 0.230            | 25.4             |
| PhE <sub>10</sub>   | 1 : 10                                                           | 580                                    | 0.256            | 29.7             |
| PhE <sub>20</sub>   | 1 : 20                                                           | 563                                    | 0.251            | 34.1             |
| PhE <sub>25</sub>   | 1 : 25                                                           | 535                                    | 0.247            | 34.5             |
| PhE <sub>30</sub>   | 1 : 30                                                           | 514                                    | 0.205            | 36.9             |

<sup>a</sup> Measured in methanol.

<sup>b</sup> Average hydrodynamic diameter of the resultant nanoparticles.

<sup>c</sup> Polydispersity index obtained from the accessory software.
